# Supplementary material for: Health effects of exposure to β-carboline heterocyclic amines: insight into metabolic perturbations and biochemical analysis
Source: Royal Society of Chemistry journal article supplement (doi:10.1039/d2fo03722j), 2023-01-01
Supplement: d2fo03722j1.pdf [file d2fo03722j1.pdf]

**Supplementary Table 1.** The pathway analysis of the identified metabolites affected in the experiment groups. Based on the selected serum metabolites, the global metabolic disorders of the most relevant pathways affected by harmene exposure were revealed using the MetaboAnalyst 4.0.

| Metabolism pathway                          | P        | -log(p) | Holm<br>adjust | FDR     | Impact  |
|---------------------------------------------|----------|---------|----------------|---------|---------|
| Pyruvate metabolism                         | 0.00539  | 5.2232  | 0.45276        | 0.45276 | 0.0311  |
| Arginine biosynthesis                       | 0.072017 | 2.6308  | 1              | 1       | 0.06091 |
| Selenocompound metabolism                   | 0.10146  | 2.288   | 1              | 1       | 0       |
| Citrate cycle (TCA cycle)                   | 0.10146  | 2.288   | 1              | 1       | 0.04412 |
| Glycolysis / Gluconeogenesis                | 0.13009  | 2.0395  | 1              | 1       | 0       |
| Alanine, aspartate and glutamate metabolism | 0.13945  | 1.97    | 1              | 1       | 0       |
| Glutathione metabolism                      | 0.13945  | 1.97    | 1              | 1       | 0       |
| Glyoxylate and dicarboxylate metabolism     | 0.15792  | 1.8457  | 1              | 1       | 0       |
| Arginine and proline metabolism             | 0.18496  | 1.6876  | 1              | 1       | 0.11063 |
| Pyrimidine metabolism                       | 0.18939  | 1.6639  | 1              | 1       | 0.03727 |
| Aminoacyl-tRNA biosynthesis                 | 0.22835  | 1.4769  | 1              | 1       | 0       |

**Supplementary Table 2.** The pathway analysis of the identified metabolites affected in the experiment groups. Based on the selected urine metabolites, the global metabolic disorders of the most relevant pathways affected by harmane exposure were revealed using the MetaboAnalyst 4.0.

| Metabolism pathway                          | P        | -log(p) | Holm<br>adjust | FDR     | Impact  |
|---------------------------------------------|----------|---------|----------------|---------|---------|
| Phenylalanine metabolism                    | 0.005005 | 5.2973  | 0.42044        | 0.42044 | 0       |
| Vitamin B6 metabolism                       | 0.080673 | 2.5174  | 1              | 1       | 0       |
| Ascorbate and aldarate metabolism           | 0.089253 | 2.4163  | 1              | 1       | 0       |
| Biotin metabolism                           | 0.089253 | 2.4163  | 1              | 1       | 0       |
| Butanoate metabolism                        | 0.13105  | 2.0322  | 1              | 1       | 0.03175 |
| Fructose and mannose metabolism             | 0.15527  | 1.8626  | 1              | 1       | 0       |
| Citrate cycle (TCA cycle)                   | 0.17106  | 1.7657  | 1              | 1       | 0.05003 |
| Lysine degradation                          | 0.20936  | 1.5637  | 1              | 1       | 0       |
| Alanine, aspartate and glutamate metabolism | 0.23154  | 1.463   | 1              | 1       | 0.08654 |
| Glyoxylate and dicarboxylate metabolism     | 0.26021  | 1.3463  | 1              | 1       | 0.02381 |
| Amino sugar and nucleotide sugar metabolism | 0.29466  | 1.2219  | 1              | 1       | 0       |
| Arginine and proline metabolism             | 0.30137  | 1.1994  | 1              | 1       | 0.02385 |

---

|                             |         |         |   |   |         |
|-----------------------------|---------|---------|---|---|---------|
| Aminoacyl-tRNA biosynthesis | 0.36527 | 1.0071  | 1 | 1 | 0       |
| Purine metabolism           | 0.46682 | 0.76181 | 1 | 1 | 0.00012 |

---

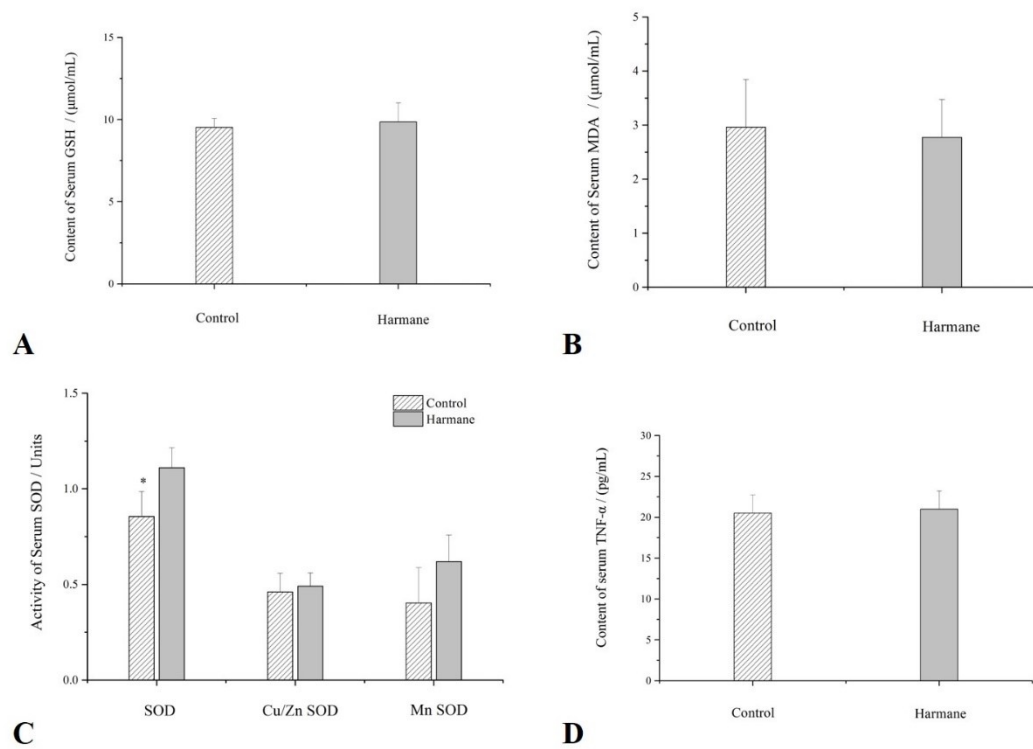

**Supplementary Figure 1.** Serum oxidative stress and inflammation stress level including the content of GSH (A), MDA (B), TNF- $\alpha$  (D), and the activity of SOD (C).

\*:  $p < 0.05$  versus control group.

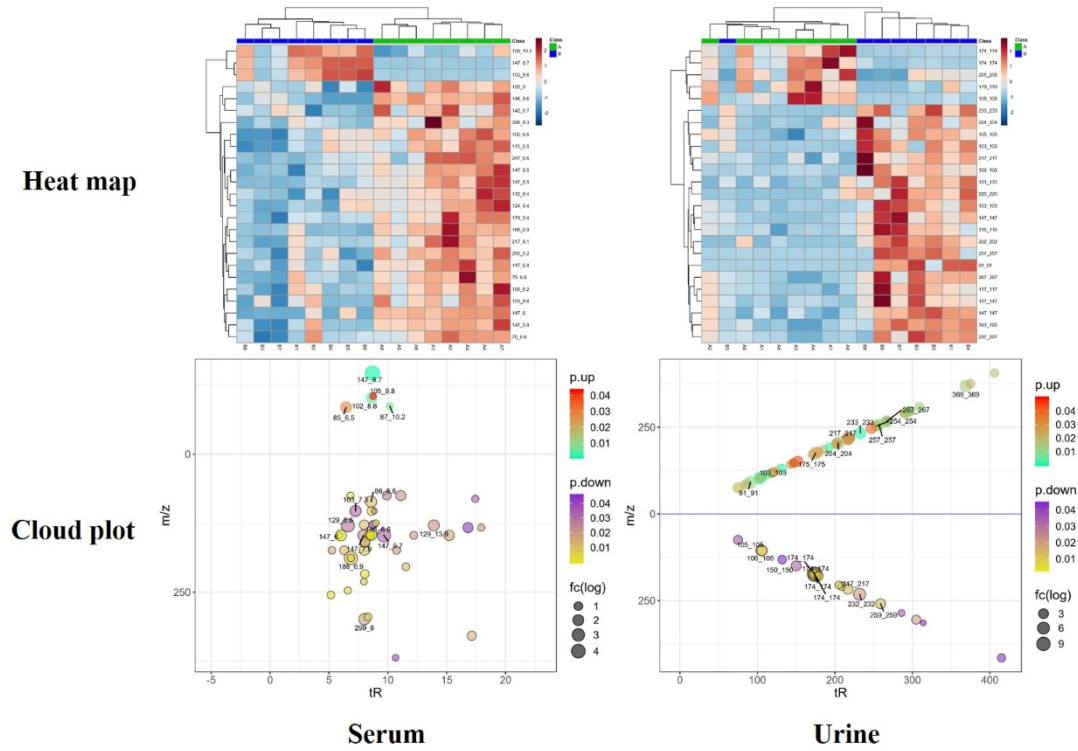

**Supplementary Figure 2.** Heat map visualizing the changes in the concentration of potential biomarkers in the serum and urine samples of harmane exposure. Rows: samples. Columns: biomarkers extracted from the volcano plot in the serum and urine samples of the control group and CML group. Color key indicates the concentration of metabolites: blue, lowest; red, highest. And cloud map visualizing the  $p$ -value, the directional fold change, the retention time, and the mass-to-change ratio features of metabolites in the serum and urine samples.
